# Supplementary material for: Wie eine App den Übergang zur Elternschaft erleichtert
Source: Springer Nature journal article supplement (doi:10.1007/s43877-023-0834-x), 2023-11-01
Supplement: MOESM1 [file 26288146]

## Abbildung 2

### zum Beitrag „Wie eine App den Übergang zur Elternschaft erleichtert“

von Caroline Seiferth, Lea Vogel, Carmen Henning

*HebammenWissen (4) 6/2023, S. 52-55*

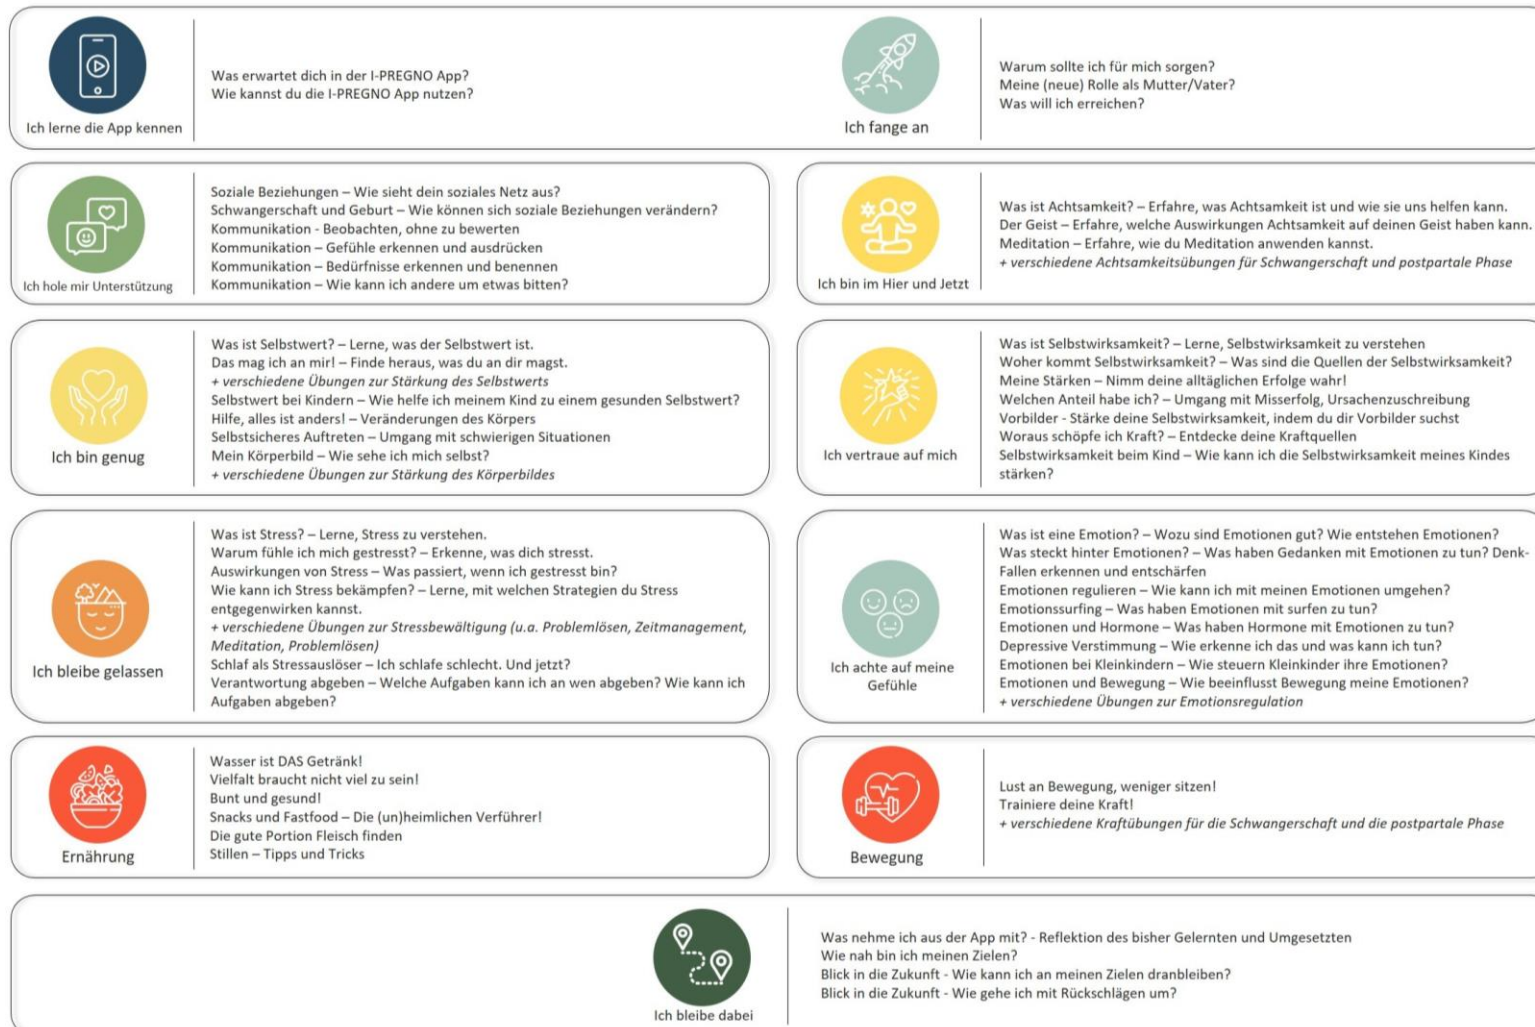

**Abb. 2:** Darstellung der Module und Inhalte der I-PREGNO-App // © L. Vogel, C. Seiferth, C. Henning
